# Supplementary material for: Amelioration of Functional, Metabolic, and Morphological Deterioration in the Retina following Retinal Detachment by Green Tea Extract
Source: MDPI journal article supplement (doi:10.3390/antiox13020235), 2024-02-15
Supplement: s1 [file s1]

## Supplementation

**Figure S1.** Diagram shows representative multiplex blotting of cytokines from Non-RD, RD, and GTE (142.9 mg/kg) group.

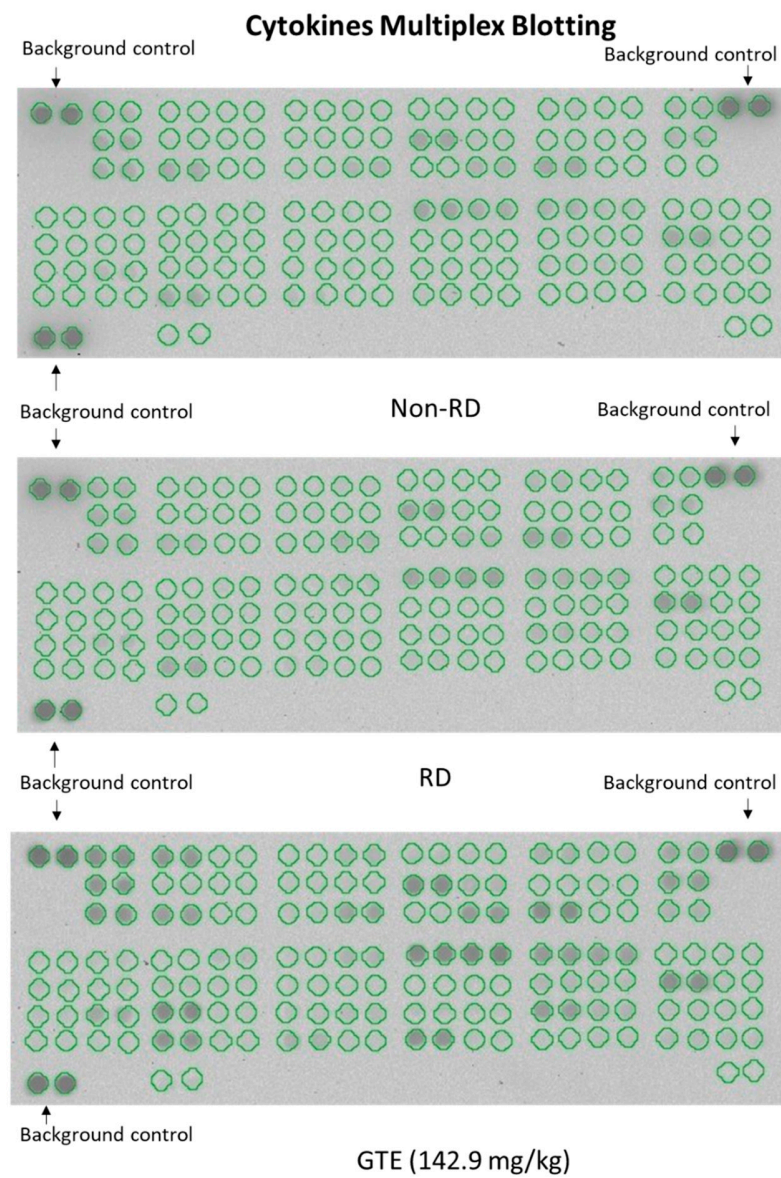

**Table S1.** Results of normalized ONL thickness from different groups, Non-RD, RD, EGCG 96.25mg/kg, EGCG 192.5mg/kg, and GTE 142.5mg/kg in batch 1 analysis as shown in Figure 3.

| Batch 1           |                      |      |                      |                      |                       |
|-------------------|----------------------|------|----------------------|----------------------|-----------------------|
|                   | Normalized Thickness |      |                      |                      |                       |
|                   | Non-RD               | RD   | EGCG 96.25mg/kg (T1) | EGCG 192.5mg/kg (T2) | GTE 142.5mg/kg (GTE1) |
|                   | 0.97                 | 1.29 | 1.13                 | 0.96                 | 0.98                  |
|                   | 0.94                 | 1.27 | 0.91                 | 1.20                 | 1.19                  |
|                   | 0.80                 | 1.04 | 1.54                 | 0.97                 | 0.94                  |
|                   | 1.11                 | 1.21 | 0.92                 | 0.81                 |                       |
|                   | 0.89                 | 1.00 | 1.30                 | 0.76                 | 0.80                  |
|                   | 1.07                 | 1.00 | 1.03                 | 0.70                 | 0.81                  |
|                   | 0.89                 | 1.24 | 1.00                 | 0.98                 | 0.92                  |
|                   | 0.90                 | 0.71 | 1.53                 | 1.43                 | 0.97                  |
|                   | 1.15                 | 1.03 | 0.56                 | 0.91                 | 0.91                  |
|                   | 1.01                 | 1.23 | 1.18                 | 1.02                 | 0.86                  |
|                   | 0.82                 | 1.28 | 0.86                 | 1.10                 |                       |
|                   | 1.14                 | 0.97 | 0.88                 | 0.78                 | 0.86                  |
|                   | 0.97                 | 0.73 | 0.80                 | 1.09                 | 1.21                  |
|                   | 0.92                 | 0.85 | 0.96                 | 1.44                 | 0.84                  |
|                   | 0.95                 | 0.70 | 0.75                 |                      | 1.08                  |
|                   | 0.91                 | 0.94 | 0.65                 | 0.95                 | 0.80                  |
|                   | 0.81                 | 0.51 | 0.54                 | 0.93                 | 0.87                  |
|                   | 0.76                 | 0.42 | 0.85                 | 1.35                 | 0.85                  |
|                   | 1.10                 | 0.70 | 0.91                 | 0.79                 | 0.84                  |
|                   | 0.74                 | 1.23 | 1.16                 | 0.75                 | 1.09                  |
|                   | 1.09                 | 0.64 | 0.91                 | 1.18                 | 0.97                  |
|                   | 0.88                 | 1.14 | 0.82                 | 1.01                 | 0.86                  |
|                   | 1.01                 | 1.17 | 1.39                 | 0.93                 | 1.20                  |
|                   | 0.94                 |      | 1.26                 | 1.03                 | 0.69                  |
|                   |                      | 1.49 |                      | 0.68                 | 0.86                  |
|                   | 0.90                 | 1.91 | 1.56                 | 0.93                 |                       |
|                   | 1.10                 | 1.16 | 1.30                 | 0.64                 | 0.96                  |
|                   | 0.59                 | 2.77 | 0.73                 | 1.26                 | 0.95                  |
|                   | 0.97                 | 2.10 | 1.96                 | 1.41                 | 0.99                  |
|                   | 0.99                 | 0.94 | 1.31                 | 0.93                 | 0.73                  |
| Mean              | 0.94                 | 1.13 | 1.06                 | 1.00                 | 0.93                  |
| SD                | 0.13                 | 0.48 | 0.33                 | 0.23                 | 0.13                  |
| SEM               | 0.02                 | 0.09 | 0.06                 | 0.04                 | 0.02                  |
| T-test: Non-RD-RD | 0.05                 |      |                      |                      |                       |
| T-test: T1-RD     |                      |      | 0.54                 |                      |                       |
| T-test: T2-RD     |                      |      |                      | 0.20                 |                       |
| T-test: GTE1-RD   |                      |      |                      |                      | 0.04                  |

**Table S2.** Results of normalized ONL thickness from different groups, Non-RD, RD, GTE 275 mg/kg, and EGCG 500 mg/kg in batch 2 analysis as shown in Figure 3.

| Batch 2           |                      |      |                     |                     |
|-------------------|----------------------|------|---------------------|---------------------|
|                   | Normalized Thickness |      |                     |                     |
|                   | Non-RD               | RD   | GTE 275mg/kg (GTE2) | GTE 550mg/kg (GTE3) |
|                   | 0.90                 |      | 1.22                | 1.14                |
|                   | 1.22                 | 1.51 | 1.43                | 0.80                |
|                   | 1.08                 | 1.64 | 1.14                | 0.75                |
|                   | 0.94                 | 1.80 | 1.41                | 0.72                |
|                   | 0.96                 | 1.69 | 1.25                | 0.64                |
|                   | 1.08                 | 1.82 | 1.48                | 0.80                |
|                   | 1.08                 | 2.18 | 0.84                | 0.82                |
|                   | 0.87                 | 1.45 | 1.49                | 0.55                |
|                   | 1.23                 | 2.15 | 1.58                | 0.78                |
|                   | 0.91                 | 2.49 | 1.31                | 0.67                |
|                   | 0.98                 | 1.04 | 1.04                | 1.31                |
|                   | 1.18                 | 1.35 | 1.22                | 0.94                |
|                   | 1.07                 | 1.60 | 1.38                | 0.94                |
|                   | 0.71                 | 1.25 | 1.17                | 0.67                |
|                   | 1.17                 | 0.75 | 1.34                | 0.84                |
|                   | 0.90                 | 0.98 | 1.34                | 0.83                |
|                   | 1.20                 | 1.34 | 1.56                | 0.80                |
|                   | 0.98                 | 1.13 | 1.32                | 0.91                |
|                   | 0.99                 | 1.03 | 1.24                | 0.86                |
|                   | 0.94                 |      | 1.06                | 0.79                |
|                   | 0.82                 | 1.19 | 0.97                | 0.59                |
|                   | 0.65                 | 0.87 | 1.13                | 0.74                |
|                   | 0.69                 | 1.09 | 0.90                | 1.36                |
|                   | 0.82                 | 1.08 | 0.86                | 0.85                |
|                   | 0.82                 | 0.94 | 0.94                | 0.98                |
|                   | 1.10                 | 0.97 | 1.04                | 0.94                |
|                   | 1.46                 | 0.95 | 1.12                | 0.84                |
|                   | 1.01                 | 1.00 | 1.23                | 1.87                |
|                   | 0.78                 | 1.00 | 1.04                | 0.72                |
|                   | 1.22                 | 0.84 | 0.88                | 0.82                |
| Mean              | 0.99                 | 1.33 | 1.20                | 0.88                |
| SD                | 0.19                 | 0.45 | 0.21                | 0.26                |
| SEM               | 0.03                 | 0.08 | 0.04                | 0.05                |
| T-test: Non-RD-RD | 0.0008               |      |                     |                     |
| T-test: GTE2-RD   |                      |      | 0.18                |                     |
| T-test: GTE3-RD   |                      |      |                     | 0.0000              |

**Table S3.** Scotopic (a) and photopic (b) results of ERG of Non-RD, RD, EGCG 96.25mg/kg, EGCG 192.5mg/kg, and GTE 142.5mg/kg in batch 1 analysis as shown in Figure 4.

(a)

|                        |                                  |       |       |       |        |                                  |        |        |        |        |
|------------------------|----------------------------------|-------|-------|-------|--------|----------------------------------|--------|--------|--------|--------|
| <b>Batch 1</b>         |                                  |       |       |       |        |                                  |        |        |        |        |
| Scotopic               |                                  |       |       |       |        |                                  |        |        |        |        |
|                        | <b>1.0 (P)cd.s/m<sup>2</sup></b> |       |       |       |        | <b>1.0 (P)cd.s/m<sup>2</sup></b> |        |        |        |        |
|                        | <b>a-wave amplitude</b>          |       |       |       |        | <b>b-wave amplitude</b>          |        |        |        |        |
|                        | Non-RD                           | RD    | T1    | T3    | GTE1   | Non-RD                           | RD     | T1     | T3     | GTE1   |
| Right Eye1             | 156.5                            | 84.17 | 71    | 99.93 | 123.5  | 522.6                            | 403.8  | 238.8  | 333.2  | 336.8  |
|                        | 149.9                            | 120.6 | 79.75 | 105.2 | 96.12  | 500.9                            | 403.9  | 228.5  | 299.6  | 319.2  |
|                        | 135.1                            | 118.2 | 56.83 | 97.72 | 87.66  | 524                              | 403.9  | 223.5  | 276.8  | 278    |
|                        | 163                              | 133.4 | 76.37 | 90.25 | 109.7  | 512.4                            | 432.6  | 237    | 293.3  | 352.2  |
|                        | 150.5                            | 111.9 | 57.17 | 112.3 | 99.3   | 501.3                            | 402.7  | 238.6  | 297.4  | 324.1  |
|                        | 147.8                            | 113.7 | 67.13 | 99.61 | 103    | 485.6                            | 406.6  | 229.4  | 293.3  | 317.4  |
| Repeat                 | 140.5                            |       |       |       |        | 510.1                            |        |        |        |        |
|                        | 132.1                            |       |       |       |        | 504.3                            |        |        |        |        |
|                        | 140.1                            |       |       |       |        | 513.9                            |        |        |        |        |
|                        | 141                              |       |       |       |        | 495                              |        |        |        |        |
| Left Eye1              | 186.1                            | 69.69 | 44.89 | 88.69 | 96.55  | 682.3                            | 303    | 157.8  | 294.8  | 306    |
|                        | 181                              | 77.81 | 68.05 | 100.1 | 88.72  | 672.1                            | 288.2  | 159.3  | 271.8  | 296.5  |
|                        | 183.3                            | 103   | 38.28 | 90.25 | 85.04  | 722.8                            | 301.5  | 150.9  | 261.8  | 265.8  |
|                        | 195.8                            | 103.5 | 58.6  | 72.96 | 83.47  | 709                              | 338.3  | 156.3  | 252.5  | 292.2  |
|                        | 164.7                            | 79.98 | 52.7  | 92.05 | 94.38  | 601                              | 254.1  | 150.2  | 284.4  | 314.1  |
|                        | 164.5                            | 80.32 | 51.56 | 87.16 | 88.53  | 607.8                            | 293.2  | 150.7  | 268    | 284.5  |
| Repeat                 | 140.3                            |       |       |       |        | 590                              |        |        |        |        |
|                        | 145                              |       |       |       |        | 612.7                            |        |        |        |        |
|                        | 156.3                            |       |       |       |        | 620.1                            |        |        |        |        |
|                        | 165.2                            |       |       |       |        | 637.7                            |        |        |        |        |
| Right Eye2             | 53.28                            | 65.29 | 43.73 | 107.4 | 113.6  | 231.3                            | 193.8  | 149.2  | 188.7  | 305.5  |
|                        | 56.1                             | 73.27 | 56.91 | 63.89 | 102.7  | 273.7                            | 225.4  | 169.2  | 158.4  | 304.1  |
|                        | 56.68                            | 49.49 | 50.56 | 26.43 | 93.47  | 274.3                            | 201.9  | 153.3  | 149.4  | 289    |
|                        | 59.14                            | 85.18 | 49.54 | 89.44 | 119.8  | 255.2                            | 217    | 155.3  | 212.4  | 274.6  |
|                        | 72.74                            | 66.09 | 49.63 | 74.61 | 99.61  | 284.9                            | 221    | 150    | 191.3  | 285.9  |
|                        | 58.37                            | 65.59 | 49.25 | 69.44 | 103.8  | 256.5                            | 208.5  | 149.6  | 173.8  | 281.7  |
| Left Eye2              | 78.55                            | 46.66 | 53.29 | 64.27 | 134    | 350.3                            | 74.16  | 233.9  | 77.83  | 409.5  |
|                        | 92.62                            | 32.88 | 79.64 | 18.86 | 119    | 348.9                            | 124.3  | 256.8  | 40.8   | 409    |
|                        | 75.08                            | 16.72 | 54.28 | 6.287 | 103.3  | 363.2                            | 89.53  | 229    | 51.7   | 379.3  |
|                        | 89.3                             | 24.05 | 50.76 | 55.09 | 124    | 365                              | 99.54  | 236.4  | 115    | 392.7  |
|                        | 99.25                            | 24.66 | 58.06 | 30.21 | 134.8  | 389.5                            | 117.2  | 236.7  | 42.25  | 403.5  |
|                        | 89.58                            | 22.71 | 57.51 | 26.31 | 121.3  | 360.8                            | 100.9  | 233.6  | 44.67  | 395.2  |
| Right Eye3             | 123.5                            | 63.96 | 62.89 | 23.74 | 114.2  | 325.9                            | 219.7  | 164.70 | 43     | 324.7  |
|                        | 88.09                            | 66.69 | 49.6  | 0     | 118.4  | 269.3                            | 220.9  | 168.8  | 30.89  | 333    |
|                        | 90.45                            | 56.01 | 60.22 | 14.53 | 105.8  | 255.5                            | 216.1  | 165.2  | 44.98  | 312.6  |
|                        | 64.14                            | 54.07 | 63.39 | 31.58 | 93.48  | 248.3                            | 207    | 157.6  | 52.77  | 328    |
|                        | 77.74                            | 55.17 | 46.96 | 43.58 | 105.1  | 253.4                            | 201.9  | 161.6  | 61.88  | 283.3  |
| Left Eye3              | 114.1                            | 73.84 | 86.87 | 0     | 115.8  | 372.5                            | 246    | 246.8  | 40.39  | 321.5  |
|                        | 119.3                            | 68.49 | 77.66 | 11.94 | 104.3  | 344.4                            | 240.7  | 252.1  | 30.66  | 316.4  |
|                        | 99.08                            | 73.34 | 89.96 | 21.31 | 114.7  | 337.8                            | 239.2  | 2424   | 22.98  | 298.5  |
|                        | 76.31                            | 80.88 | 78.19 | 19.11 | 67.13  | 313.6                            | 266.8  | 220.4  | 46.4   | 282    |
|                        | 90.53                            | 84.44 | 96.49 | 0     | 118    | 333.6                            | 253.8  | 245.3  | 25.87  | 289.2  |
| Mean                   | 118.16                           | 71.93 | 61.40 | 56.89 | 105.36 | 436.51                           | 247.56 | 261.19 | 155.09 | 320.76 |
| SD                     | 42.09                            | 29.17 | 14.37 | 37.81 | 15.16  | 149.39                           | 98.61  | 384.31 | 110.87 | 41.50  |
| REM                    | 6.34                             | 4.86  | 2.40  | 6.30  | 2.53   | 22.52                            | 16.44  | 64.05  | 18.48  | 6.92   |
| t-test compare to RD = | 0.000                            |       | 0.065 | 0.071 | 0.000  | 0.000                            |        | 0.842  | 0.001  | 0.000  |

(b)

|                        |                  |        |        |        |        |
|------------------------|------------------|--------|--------|--------|--------|
| Batch 1                |                  |        |        |        |        |
| Photopic               |                  |        |        |        |        |
|                        | 4-LA 3.0 ERG     |        |        |        |        |
|                        | b-wave amplitude |        |        |        |        |
|                        | Neg R1           | Pos R1 | T1 R1  | T3 R1  | GTE R1 |
| Right Eye1             | 106.8            | 86.77  | 50.97  | 39.98  | 74.12  |
| Left Eye1              | 140.1            | 39.41  | 36.05  | 51.3   | 77.51  |
| Right Eye2             | 76.08            | 41.02  | 43.18  | 42.17  | 67.37  |
| Left Eye2              | 86.3             | 27.27  | 56.77  | 19.71  | 94.53  |
| Right Eye3             | 34.27            | 32.87  | 21.34  |        | 74.12  |
| Left Eye3              | 52.17            | 64.58  | 37.45  |        | 77.51  |
| Mean                   | 82.62            | 48.65  | 40.96  | 38.29  | 77.53  |
| SD                     | 37.973           | 22.612 | 12.462 | 13.321 | 9.116  |
| REM                    | 5.725            | 3.769  | 2.077  | 2.220  | 1.519  |
| t-test compare to RD = | 0.096            | 0.096  | 0.487  | 0.389  | 0.025  |

**Table S4.** Scotopic (a) and photopic (b) results of ERG of Non-RD, RD, EGCG 96.25mg/kg, EGCG 275 mg/kg, and GTE 550 mg/kg in batch 2 analysis as shown in Figure 4.

(a)

|                        |                           |          |          |          |                           |          |          |          |  |
|------------------------|---------------------------|----------|----------|----------|---------------------------|----------|----------|----------|--|
| Batch 2                |                           |          |          |          |                           |          |          |          |  |
| Scotopic               |                           |          |          |          |                           |          |          |          |  |
|                        | 1.0(P)cd.s/m <sup>2</sup> |          |          |          | 1.0(P)cd.s/m <sup>2</sup> |          |          |          |  |
|                        | a-wave amplitude          |          |          |          | b-wave amplitude          |          |          |          |  |
|                        | Non-RD                    | RD       | GTE2     | GTE3     | Non-RD                    | RD       | GTE2     | GTE3     |  |
| Right Eye1             | 70.2                      | 130.9    | 83.36    | 65.64    | 255.7                     | 305.5    | 301      | 204.8    |  |
|                        | 80.18                     | 118.5    | 89.69    | 75.3     | 235.6                     | 305.2    | 325.2    | 165.7    |  |
|                        | 61.16                     | 108.4    | 97.56    | 59.75    | 233.7                     | 279.3    | 335.3    | 183.1    |  |
|                        | 97.91                     | 91.75    | 95.95    | 77.12    | 264.1                     | 277.2    | 350.6    | 234.2    |  |
|                        | 43.16                     | 116.4    | 88.12    | 63.78    | 233.2                     | 320.5    | 312.1    | 202      |  |
| Left Eye1              | 70.6                      | 118      | 75.72    | 71.55    | 300.6                     | 355.1    | 206.8    | 210.8    |  |
|                        | 66.96                     | 121.2    | 72.11    | 76.38    | 293.3                     | 347.3    | 248.4    | 180.2    |  |
|                        | 104.6                     | 115      | 104.8    | 63.92    | 323.5                     | 349.6    | 285.3    | 187.9    |  |
|                        | 129.4                     | 122.7    | 74.44    | 77.12    | 358.4                     | 350.9    | 266.9    | 227.7    |  |
|                        | 70.23                     | 117.4    | 85.22    | 65.48    | 289.7                     | 364.2    | 246.9    | 198.8    |  |
| Right Eye2             | 155.4                     |          | 57.62    | 43.94    | 504.6                     |          | 153.3    | 61.86    |  |
|                        | 127.2                     |          | 51.3     | 48.81    | 470.9                     |          | 150.5    | 80.09    |  |
|                        | 146.9                     |          | 39.9     | 30.35    | 486.1                     |          | 130.8    | 81.61    |  |
|                        | 136.5                     |          | 32.89    | 54.81    | 452.8                     |          | 130.6    | 67.05    |  |
|                        | 135.6                     |          | 56.27    | 37.68    | 439.3                     |          | 158.5    | 99.44    |  |
| Left Eye2              | 202.8                     |          | 109.9    | 54.23    | 749.4                     |          | 248.3    | 94.94    |  |
|                        | 160.2                     |          | 127.5    | 49.02    | 695.7                     |          | 282.5    | 92.14    |  |
|                        | 192.9                     |          | 69.41    | 35.63    | 693.3                     |          | 231.5    | 98       |  |
|                        | 190.8                     |          | 76.47    | 66.65    | 692.1                     |          | 246      | 86.64    |  |
|                        | 171.3                     |          | 54.88    | 42.75    | 664.6                     |          | 243.1    | 111.8    |  |
| Right Eye3             | 122.7                     | 46.44    | 93.12    | 56.98    | 292.6                     | 160.6    | 172.9    | 183      |  |
|                        | 110.6                     | 50.94    | 70.08    | 73.93    | 268.9                     | 150.7    | 116      | 205.5    |  |
|                        | 105.5                     | 60.89    | 67.75    | 71.09    | 245                       | 179.5    | 125.3    | 204.9    |  |
|                        | 98.88                     | 33.6     | 67.02    | 57.52    | 282.1                     | 155.1    | 128      | 205.3    |  |
|                        | 94.32                     | 45.73    | 66.72    |          | 259.6                     | 120      | 127.4    | 191.4    |  |
| Left Eye3              | 118                       | 68.59    | 69.17    | 80.23    | 374.6                     | 265.2    | 128.5    | 249.6    |  |
|                        | 127.7                     | 70.8     | 48.76    | 100.2    | 363.7                     | 242.5    | 83.4     | 280.7    |  |
|                        | 114.1                     | 68.02    | 42.74    | 81.76    | 342.9                     | 263.4    | 100.4    | 263.7    |  |
|                        | 123.6                     | 35.95    | 37.69    | 80.19    | 368.2                     | 250.5    | 98.06    | 265.3    |  |
|                        | 123.2                     | 73.85    | 38.08    | 83.68    | 350.6                     | 242.1    | 127.9    | 267.3    |  |
| Mean                   | 118.42                    | 85.753   | 71.47467 | 63.63759 | 392.8267                  | 264.22   | 202.0487 | 172.849  |  |
| SD                     | 40.43258                  | 33.45784 | 23.28424 | 16.48181 | 159.1891                  | 76.62837 | 81.73757 | 67.77415 |  |
| REM                    | 7.38                      | 7.48     | 4.25     | 3.01     | 29.06                     | 17.13    | 14.92    | 12.37    |  |
| t-test compare to RD = | 0.003237                  |          | 0.107092 | 0.011185 | 0.000421                  |          | 0.009022 | 0.00011  |  |

(b)

|                        |                  |        |       |       |
|------------------------|------------------|--------|-------|-------|
| Batch 2                |                  |        |       |       |
| Photopic               |                  |        |       |       |
|                        | 4-LA 3.0 ERG     |        |       |       |
|                        | b-wave amplitude |        |       |       |
|                        | Non-RD           | RD     | GTE2  | GTE3  |
| Right Eye1             | 57.20            | 74.76  | 45.33 | 50.25 |
| Left Eye1              | 65.72            | 111.50 | 36.09 | 54.84 |
| Right Eye2             | 119.50           |        | 30.12 | 64.23 |
| Left Eye2              | 187.30           |        | 64.52 | 60.40 |
| Right Eye3             | 65.06            | 55.45  | 35.00 | 45.71 |
| Left Eye3              | 94.25            | 72.88  | 25.82 | 51.28 |
| Mean                   | 98.17            | 78.65  | 39.48 | 54.45 |
| SD                     | 49.48            | 23.56  | 13.91 | 6.86  |
| REM                    | 20.20            | 11.78  | 5.68  | 2.80  |
| t-test compare to RD = | 0.43             |        | 0.04  | 0.13  |

**Table S5.** Summary of the results of (a) caspase-3, (b) sphingomyelin, (c) protein carbonyl, and (d) HIF-1 $\alpha$  levels in the retina in non-RD, RD, and GTE (142.9 mg/kg) group for Figure 6.

(a)

|              | Conc of Caspase 3 /protein (ng/mg) |       |       |
|--------------|------------------------------------|-------|-------|
|              | Non-RD                             | RD    | GTE   |
|              | 1.904                              | 1.969 |       |
|              | 1.368                              | 2.912 | 1.726 |
|              | 0.529                              | 2.527 | 2.170 |
|              | 2.690                              | 1.960 | 2.402 |
|              | 0.687                              | 2.594 | 2.446 |
|              | 0.566                              | 2.577 | 2.573 |
| Mean         | 1.291                              | 2.423 | 2.263 |
| SD           | 0.873                              | 0.380 | 0.334 |
| SEM          | 0.356                              | 0.155 | 0.149 |
| ANOVA (p = ) | 0.012                              |       |       |

(b)

|             | Conc. of Sphingomyelin/protein (nmol/ $\mu$ g) |       |       |
|-------------|------------------------------------------------|-------|-------|
|             | Non-RD                                         | RD    | GTE   |
|             | 0.029                                          | 0.015 | 0.014 |
|             | 0.032                                          | 0.008 | 0.006 |
|             | 0.021                                          | 0.008 | 0.010 |
|             | 0.017                                          | 0.007 | 0.009 |
|             | 0.023                                          | 0.029 | 0.010 |
|             | 0.026                                          | 0.031 | 0.003 |
| Mean        | 0.025                                          | 0.016 | 0.009 |
| SD          | 0.006                                          | 0.011 | 0.004 |
| SEM         | 0.002                                          | 0.004 | 0.002 |
| ANOVA (p =) |                                                |       | 0.007 |

(c)

|             | Conc. of protein carbonyl/protein (nmol/mg) |       |       |
|-------------|---------------------------------------------|-------|-------|
|             | Non-RD                                      | RD    | GTE   |
|             | 0.056                                       | 0.129 | 0.013 |
|             | 0.035                                       | 0.056 | 0.024 |
|             |                                             | 0.042 | 0.015 |
|             | 0.093                                       | 0.097 | 0.011 |
|             | 0.037                                       | 0.050 | 0.015 |
|             | 0.070                                       | 0.048 | 0.019 |
| Mean        | 0.058                                       | 0.070 | 0.016 |
| SD          | 0.024                                       | 0.035 | 0.005 |
| SEM         | 0.011                                       | 0.014 | 0.002 |
| ANOVA (p =) |                                             |       | 0.005 |

(d)

|             | Conc. of HIF-1 $\alpha$ in each treatment (pg/ $\mu$ g) |       |       |
|-------------|---------------------------------------------------------|-------|-------|
|             | Non-RD                                                  | RD    | GTE   |
|             | 0.055                                                   | 0.164 | 0.058 |
|             | 0.049                                                   | 0.119 | 0.042 |
|             | 0.040                                                   | 0.105 | 0.083 |
|             | 0.092                                                   | 0.079 | 0.044 |
|             | 0.063                                                   | 0.088 | 0.080 |
|             | 0.053                                                   | 0.128 | 0.071 |
| Mean        | 0.059                                                   | 0.114 | 0.063 |
| SD          | 0.018                                                   | 0.031 | 0.018 |
| SEM         | 0.007                                                   | 0.013 | 0.007 |
| ANOVA (p =) |                                                         | 0.001 |       |

**Table S6.** Summary of results of differential expression of cytokines in the vitreous humors of different study groups. The expression of cytokines in the non-RD group was normalized as 1 whereas the fold changes in cytokine expressions in the other groups were compared. ANOVA with post hoc Tukey and Dunnett's test and t-test were used for the comparison where appropriate.

|                           | Normalized Resonse | Fold change reponse |          |           |       |        |            |        |         |                                 |                 |                     |                  |            |
|---------------------------|--------------------|---------------------|----------|-----------|-------|--------|------------|--------|---------|---------------------------------|-----------------|---------------------|------------------|------------|
| Analyte                   | Mean Non-RD        | Mean RD             | Mean GTE | SD Non-RD | SD RD | SD GTE | SEM Non-RD | SEM RD | SEM GTE | Sig. diff. gp (Non-RD, RD, GTE) | ANOVA (p-value) | t-test Non-RD vs RD | t-test RD vs GTE | Expression |
| CCL2/IE/MCP-1             | 1                  | 18.47               | 3.89     | 0.20      | 0.61  | 0.37   | 0.12       | 0.35   | 0.21    | RD                              | 0.010           |                     |                  | +          |
| CCL5/RANTES               | 1                  | 0.36                | 0.89     | 0.20      | 0.59  | 0.48   | 0.12       | 0.34   | 0.28    | RD                              | 0.032           |                     |                  | -          |
| CCL11/Eotaxin             | 1                  | 0.53                | 0.58     | 0.11      | 0.15  | 0.36   | 0.07       | 0.09   | 0.21    | Non-RD                          | 0.002           |                     |                  | +          |
| CCL17/TARC                | 1                  | 0.84                | 1.51     | 0.18      | 0.25  | 0.16   | 0.11       | 0.15   | 0.09    | GTE                             | 0.004           |                     |                  | +          |
| CCL20/MIP-3α              | 1                  | 38.70               | 21.38    | 0.17      | 0.61  | 1.00   | 0.10       | 0.35   | 0.58    | Non-RD                          | 0.050           |                     |                  | -          |
| CCL22/MDC                 | 1                  | 0.52                | 0.74     | 0.12      | 0.24  | 0.13   | 0.07       | 0.14   | 0.08    | RD                              | 0.001           |                     |                  | -          |
| CX3CL1/Fractalkine        | 1                  | 0.56                | 1.00     | 0.26      | 0.21  | 0.16   | 0.15       | 0.12   | 0.09    | RD                              | 0.013           |                     |                  | -          |
| EG-VEGF/PK1               | 1                  | 0.62                | 1.08     | 0.20      | 0.33  | 0.32   | 0.11       | 0.19   | 0.19    | RD                              |                 | 0.035               |                  | -          |
| Galactin-1                | 1                  | 1.92                | 1.22     | 0.17      | 0.31  | 0.18   | 0.10       | 0.18   | 0.10    | RD                              | 0.019           |                     |                  | +          |
| GDF-15                    | 1                  | 4.52                | 3.15     | 0.06      | 0.39  | 0.09   | 0.03       | 0.22   | 0.05    | Non-RD                          | 0.003           |                     |                  | -          |
| ICAM-1/CD54               | 1                  | 0.50                | 1.02     | 0.07      | 0.41  | 0.42   | 0.04       | 0.24   | 0.24    | RD                              | 0.046           |                     |                  | -          |
| IL-1α/IL-1F1              | 1                  | 0.77                | 4.20     | 0.11      | 0.16  | 1.62   | 0.06       | 0.09   | 0.93    | RD                              |                 | 0.033               |                  | -          |
| IL-2                      | 1                  | 0.64                | 0.93     | 0.17      | 0.22  | 0.21   | 0.10       | 0.13   | 0.12    | RD                              |                 | 0.020               |                  | -          |
| IL-4                      | 1                  | 0.46                | 1.20     | 0.14      | 0.49  | 0.83   | 0.08       | 0.28   | 0.48    | RD                              |                 | 0.010               |                  | -          |
| IL-6                      | 1                  | 0.63                | 0.69     | 0.23      | 0.16  | 0.44   | 0.13       | 0.09   | 0.25    | RD                              |                 | 0.040               |                  | -          |
| IL-13                     | 1                  | 0.58                | 3.56     | 0.14      | 0.36  | 1.56   | 0.08       | 0.21   | 0.90    | RD                              |                 | 0.020               |                  | -          |
| IL-17A                    | 1                  | 1.18                | 1.95     | 0.27      | 0.22  | 0.24   | 0.16       | 0.13   | 0.14    | GTE                             | 0.009           |                     |                  | +          |
| LIF                       | 1                  | 0.67                | 0.75     | 0.08      | 0.19  | 0.44   | 0.05       | 0.11   | 0.25    | Non-RD                          |                 | 0.007               |                  | +          |
| Lipocalin-2/NGAL          | 1                  | 1.89                | 2.01     | 0.14      | 0.21  | 0.44   | 0.08       | 0.12   | 0.25    | Non-RD                          |                 | 0.017               |                  | -          |
| Osteopontin (OPN)         | 1                  | 5.99                | 3.14     | 0.22      | 0.62  | 0.30   | 0.13       | 0.36   | 0.17    | Non-RD                          | 0.033           |                     |                  | -          |
| Prolactin                 | 1                  | 0.03                | 0.06     | 1.05      | 0.17  | 0.31   | 0.61       | 0.10   | 0.18    | RD                              |                 |                     | 0.050            | -          |
| TWEAK/TNFSF12             | 1                  | 0.53                | 0.97     | 0.08      | 0.08  | 0.16   | 0.04       | 0.04   | 0.09    | RD                              | 0.000           |                     |                  | -          |
| Neprilysin/CD10           | 1                  | 0.63                | 0.96     | 0.22      | 0.06  | 0.22   | 0.12       | 0.03   | 0.13    | RD                              | 0.029           |                     |                  | -          |
| Clusterin                 | 1                  | 1.58                | 2.03     | 0.16      | 0.15  | 0.08   | 0.09       | 0.09   | 0.05    | Non-RD                          | 0.000           |                     |                  | -          |
| CNTF                      | 1                  | 1.50                | 0.80     | 0.13      | 0.35  | 0.18   | 0.07       | 0.20   | 0.10    | RD                              | 0.032           |                     |                  | +          |
| Fibulin 3                 | 1                  | 2.32                | 1.03     | 0.17      | 0.23  | 0.22   | 0.10       | 0.13   | 0.13    | RD                              | 0.001           |                     |                  | +          |
| HGF                       | 1                  | 0.50                | 1.82     | 0.11      | 0.51  | 0.70   | 0.07       | 0.30   | 0.40    | RD                              |                 | 0.021               |                  | -          |
| MAG/Siglec-4a             | 1                  | 0.65                | 1.03     | 0.13      | 0.28  | 0.24   | 0.07       | 0.16   | 0.14    | RD                              | 0.040           |                     |                  | -          |
| MMP-3                     | 1                  | 15.93               | 9.99     | 0.23      | 0.16  | 0.30   | 0.13       | 0.09   | 0.17    | Non-RD                          | 0.000           |                     |                  | -          |
| Osteoprotegerin/TNFRSF11B | 1                  | 0.69                | 0.98     | 0.18      | 0.12  | 0.24   | 0.10       | 0.07   | 0.14    | RD                              |                 | 0.032               |                  | -          |
| SCF                       | 1                  | 0.61                | 0.88     | 0.03      | 0.34  | 0.27   | 0.02       | 0.20   | 0.15    | RD                              | 0.035           |                     |                  | -          |
| Serpin E1/PAI-1           | 1                  | 34.54               | 3.74     | 0.14      | 0.72  | 0.49   | 0.08       | 0.42   | 0.28    | RD                              | 0.017           |                     |                  | +          |
| Adiponectin/Acrp30        | 1                  | 4.63                | 1.37     | 0.14      | 0.34  | 0.38   | 0.08       | 0.20   | 0.22    | RD                              | 0.001           |                     |                  | +          |
| DPPIV/CD26                | 1                  | 3.13                | 0.87     | 0.34      | 0.49  | 0.21   | 0.19       | 0.28   | 0.12    | RD                              | 0.011           |                     |                  | +          |
| Fetuin A/AHSG             | 1                  | 0.87                | 0.67     | 0.56      | 0.04  | 0.05   | 0.32       | 0.03   | 0.03    | GTE                             |                 |                     | 0.000            | -          |
| FGF-21                    | 1                  | 0.59                | 0.73     | 0.07      | 0.29  | 0.33   | 0.04       | 0.17   | 0.19    | Non-RD                          | 0.024           |                     |                  | +          |
| IGF-I                     | 1                  | 16.35               | 2.51     | 0.14      | 0.69  | 0.28   | 0.08       | 0.40   | 0.16    | RD                              | 0.016           |                     |                  | +          |
| IGFBP-3                   | 1                  | 5.22                | 1.84     | 0.25      | 0.35  | 0.33   | 0.14       | 0.20   | 0.19    | RD                              | 0.001           |                     |                  | +          |
